# Supplementary material for: Redox destabilization by ibrutinib promotes ferroptosis in diffuse large B-cell lymphoma (DLBCL)
Source: Research Square preprint supplement (doi:10.21203/rs.3.rs-7038817/v1), 2025-08-11
Supplement: Supplementary file 1 [file 5d99d509a461191b530a78fc.pdf]

## Supplementary Data File

### Redox destabilization by ibrutinib promotes ferroptosis in diffuse large B-cell lymphoma (DLBCL)

5

Anuschka Langpape<sup>1,2,3</sup>, Debora Bonasera<sup>3,4,5</sup>, Jenny Stroh<sup>1,2</sup>, Moritz Reese<sup>1,2</sup>, Maria Cartolano<sup>1</sup>, Gianmaria Lippardi<sup>2,3,6\*</sup> and Silvia von Karstedt<sup>1,2,6 \*</sup>

<sup>1</sup>University of Cologne, Faculty of Medicine and University Hospital Cologne, Department of Translational Genomics, Cologne, Germany.

10 <sup>2</sup>CECAD Cluster of Excellence, Faculty of Medicine and University Hospital Cologne, Cologne, Germany.

<sup>3</sup> Genome instability, inflammation and cell death laboratory, Institute of Biochemistry I, Centre for Biochemistry, Faculty of Medicine, University of Cologne, 50931 Cologne, Germany.

15 <sup>4</sup>Cell death, inflammation and immunity laboratory, Institute of Biochemistry I, Centre for Biochemistry, Faculty of Medicine, University of Cologne, 50931 Cologne, Germany.

<sup>5</sup>Cell death, inflammation and immunity laboratory, CECAD Cluster of Excellence, University of Cologne, 50931 Cologne, Germany.

20 <sup>6</sup>Center for Molecular Medicine Cologne, Faculty of Medicine and University Hospital Cologne, Cologne, Germany.

\*Co-Last and Co-corresponding authors G.L. and S.v.K.: [Gianmaria.liccardi@uk-koeln.de](mailto:Gianmaria.liccardi@uk-koeln.de); [s.vonkarstedt@uni-koeln.de](mailto:s.vonkarstedt@uni-koeln.de)

25

30



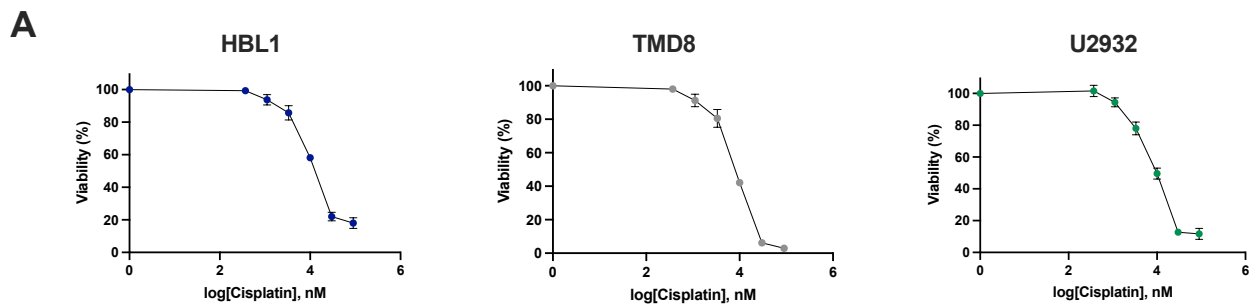

45 **Suppl. Fig. 2 DLBCL are sensitive to cisplatin treatment. a** Viability measurements of human ABC-DLBCL cell lines by CellTiter-Glo® following 48 hours treatment with increasing cisplatin concentrations. Data are mean  $\pm$  SD for each cell line of n=3 independent experiments.

50

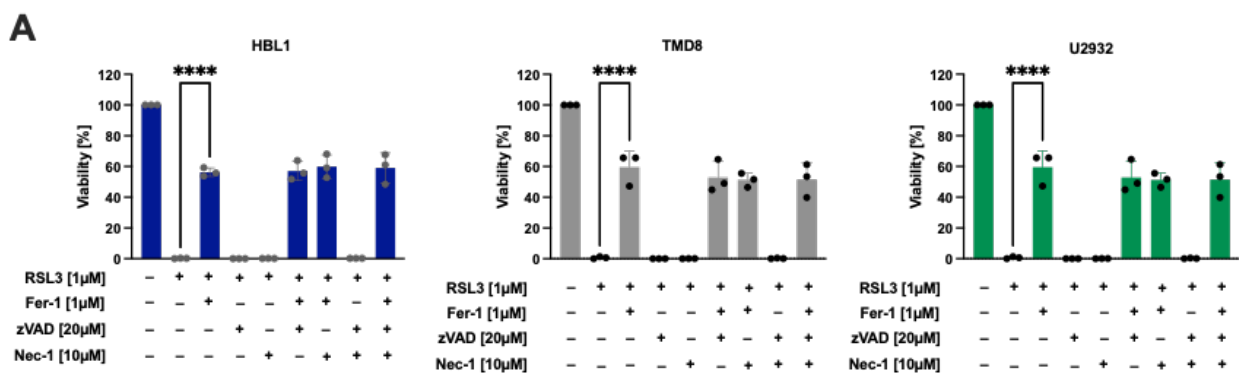

55 **Suppl. Fig. 3 DLBCL are sensitive to RSL3 induced ferroptosis. a** Viability measurements of human ABC-DLBCL cell lines by CellTiter-Glo® following 48 hours treatment indicated concentrations of RSL3 in combination with Fer-1 and/or zVAD and/or Nec-1s. Data are mean  $\pm$  SD for each cell line of n=3 independent experiments. \*=p value 0.05, \*\*=p value 0.01, \*\*\*= p value 0.001, \*\*\*\*= p value 0.0001.

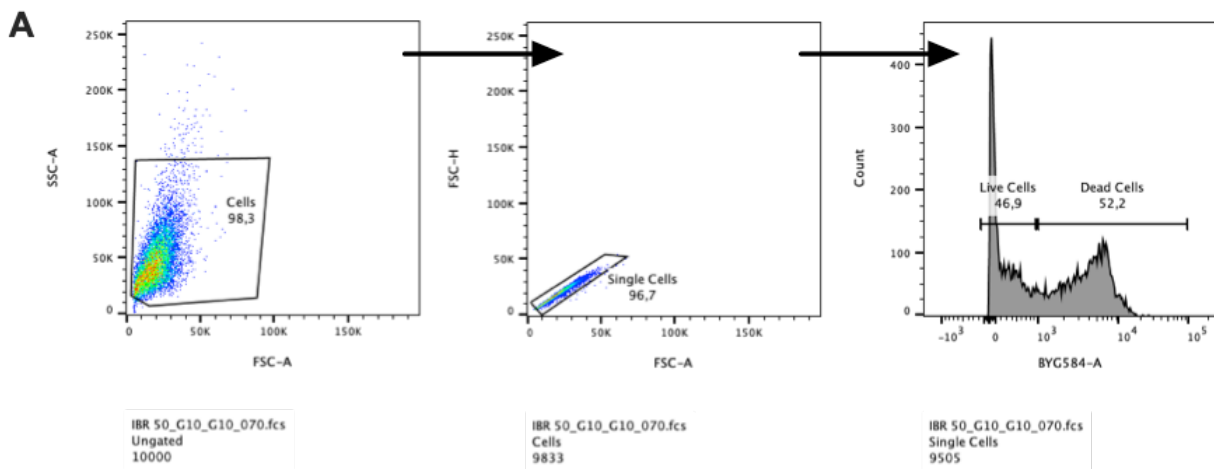

**Suppl. Fig. 4 Gating strategy of Flow cytometric analysis. a** Gating Strategy for flow cytometric analysis.

60

**A**

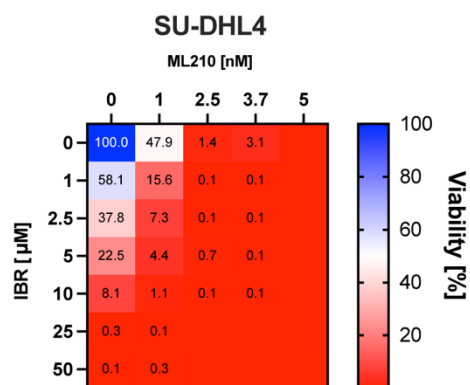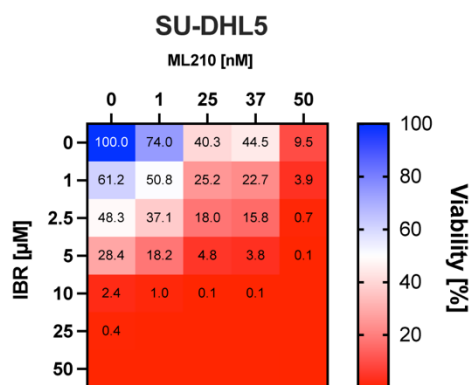

**B**

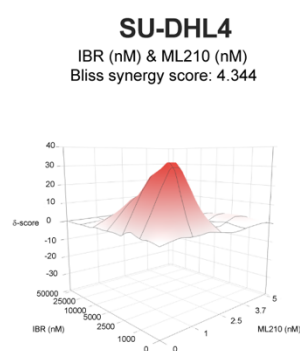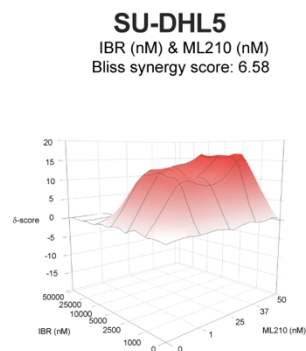

**C**

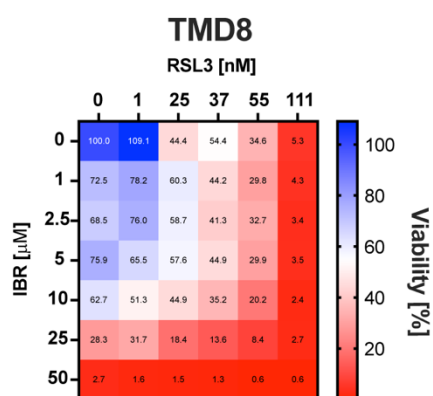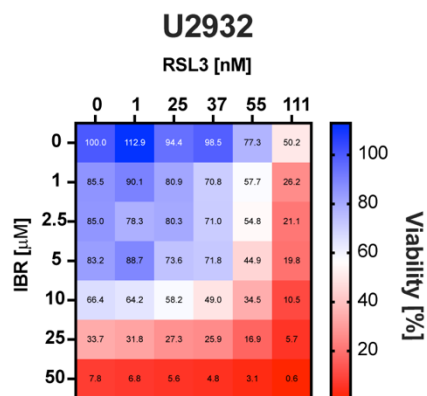

**D**

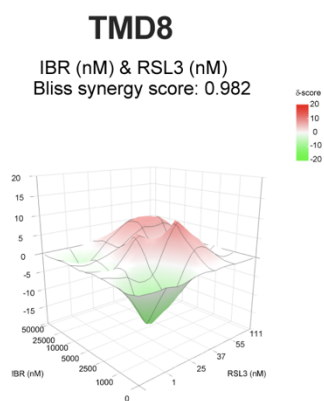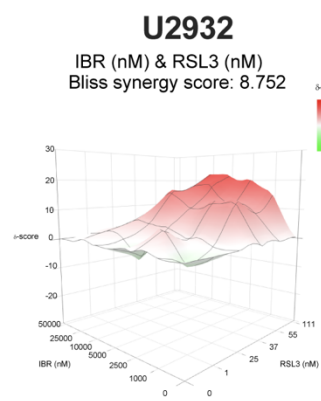

**Suppl. Fig. 5 GPX4 inhibition treatement has an additive effect in combination with Ibrutinib.**

**a-d** Cell viability of the indicated human **a** GCB-DLBCL **c** ABC-DLBCL cell lines following 48 hours treatment with increasing concentrations of **a** ML210 or **c** RSL3 in combination with IBR as determined by CellTiter-Glo®. Heatmap color code indicates viability levels of each sample. **b,d** BLISS synergy scores were determined using <https://synergyfinder.fimm.fi>.

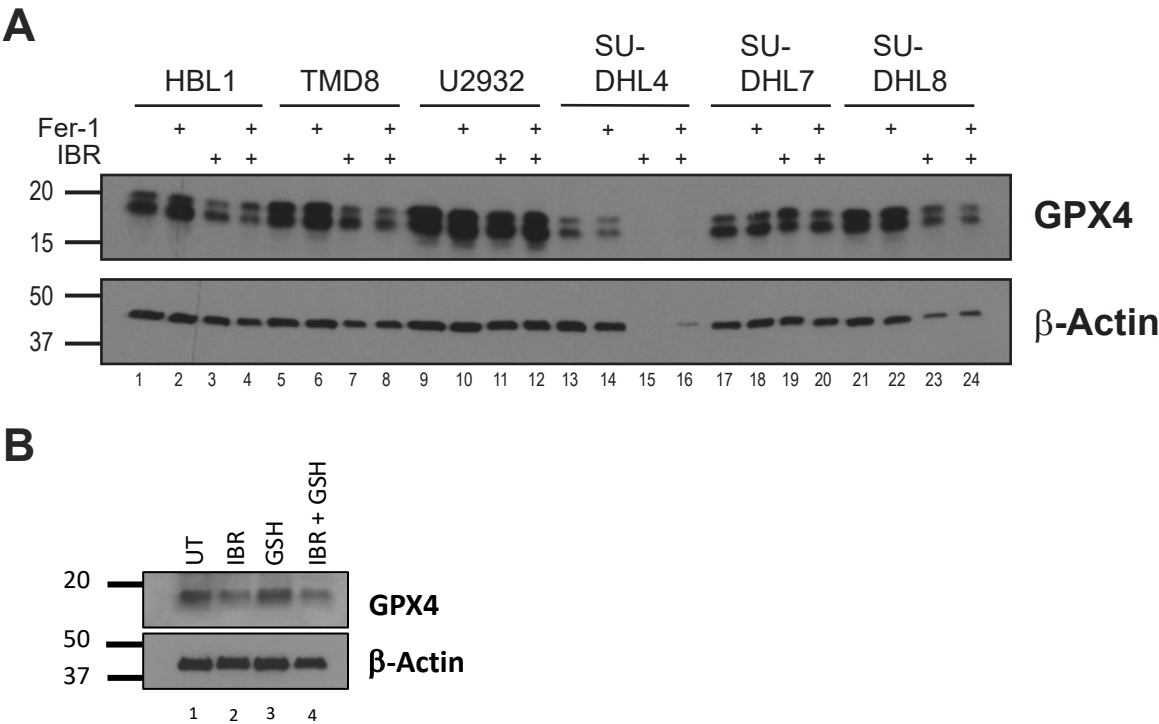

**Suppl. Fig. 6 Ibrutinib downregulates GPX4 protein levels independently of Glutathione.**

**a** Western blot analysis of indicated DLBCL cell lines following 48h of treatment with IBR [10  $\mu$ M] and/or Fer-1 [1  $\mu$ M]. **b** Western blot analysis of U2932 cells treated with IBR [25  $\mu$ M] and/or GSH [2 mM].
