# Supplementary figures and images for: Redox destabilization by ibrutinib promotes ferroptosis in diffuse large B-cell lymphoma (DLBCL)
Source: Research Square preprint supplement (doi:10.21203/rs.3.rs-7038817/v1), 2025-08-11

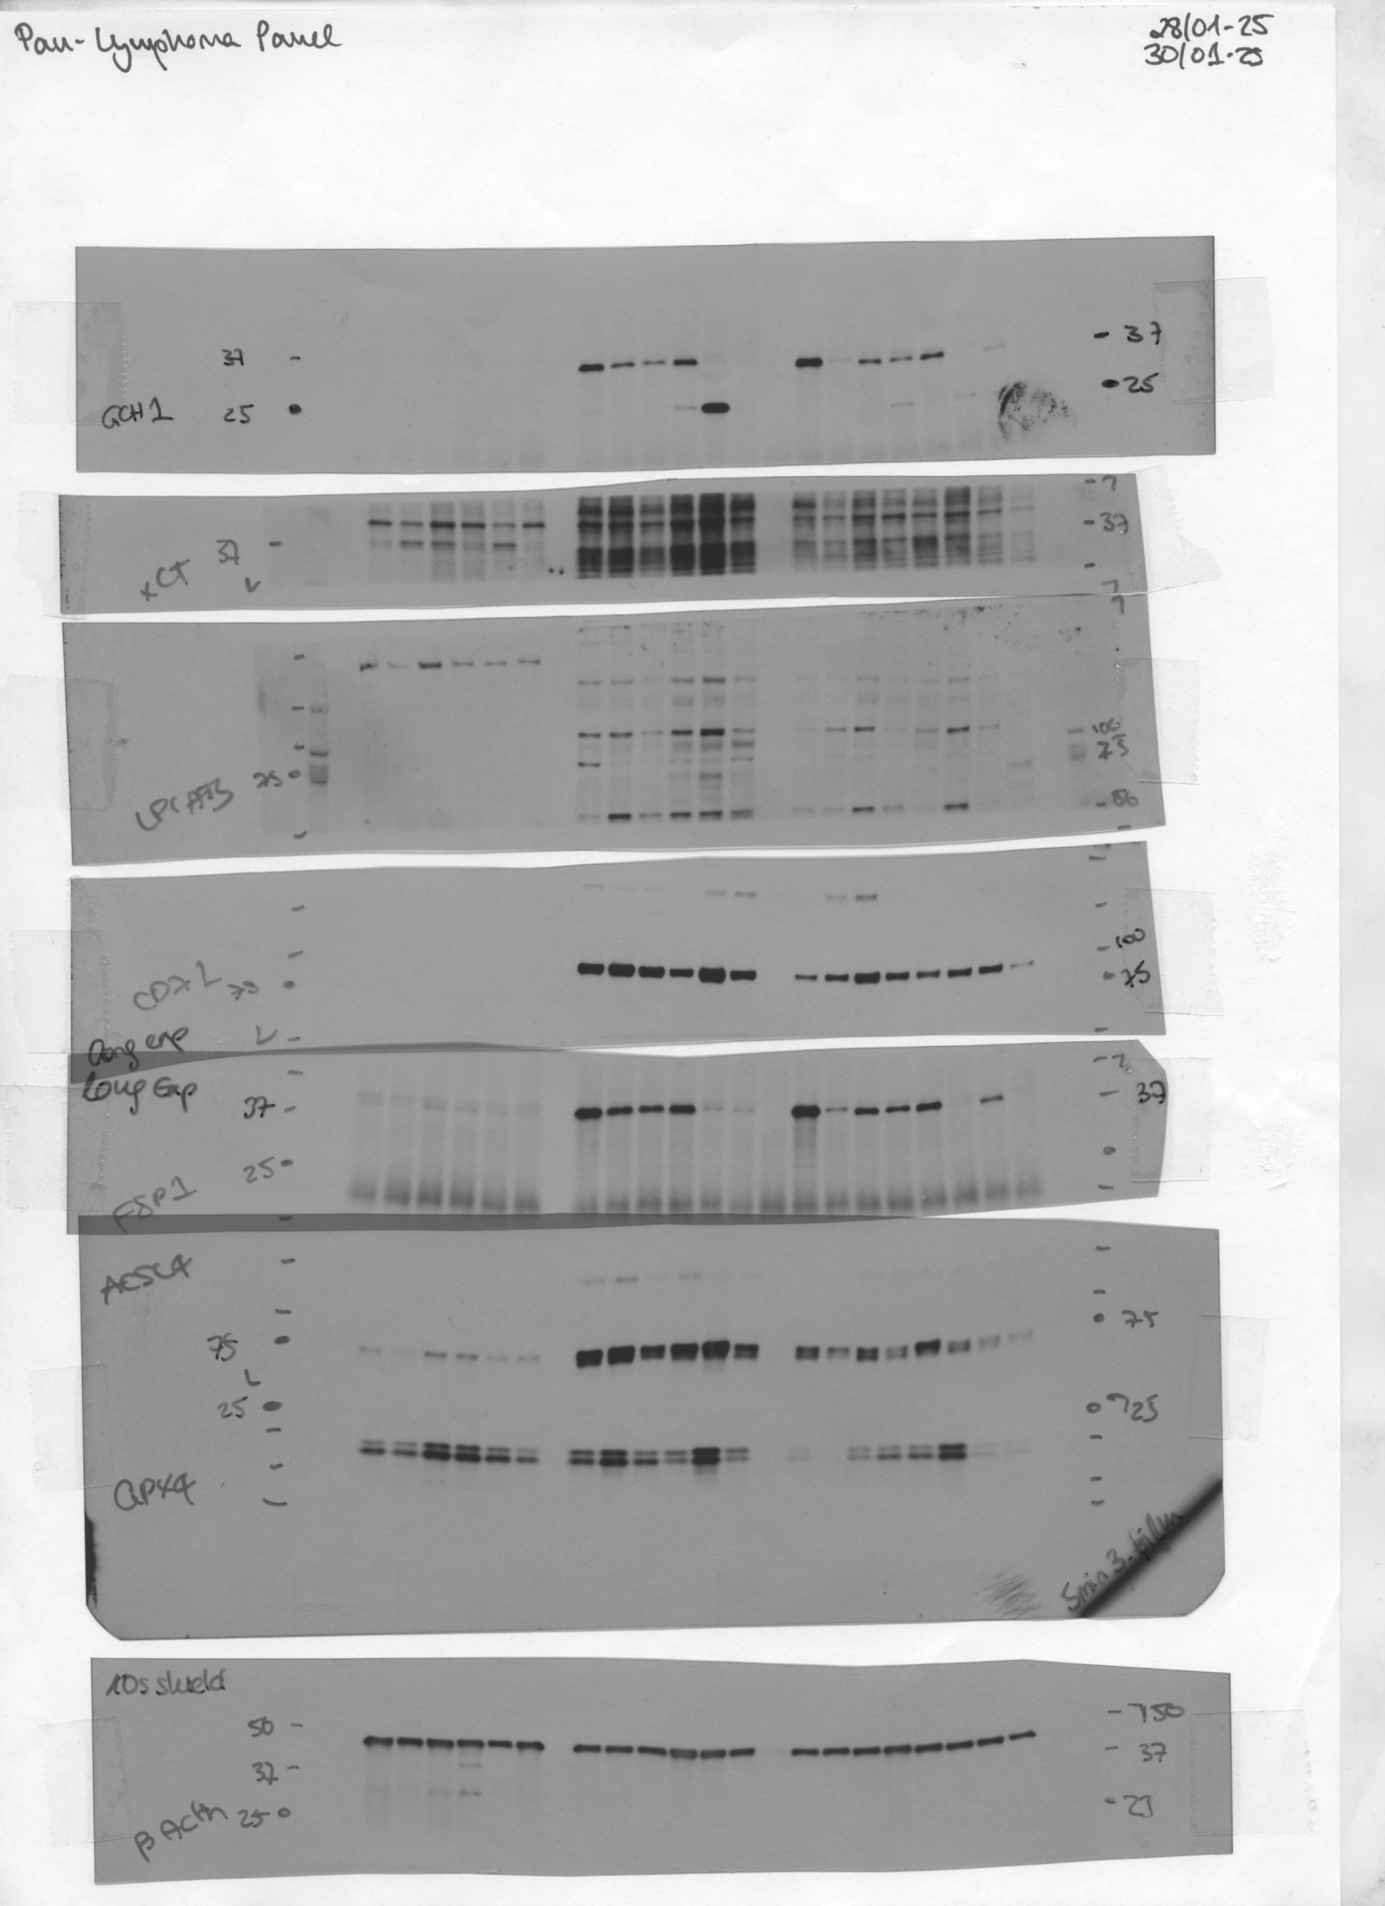


Figure 1B


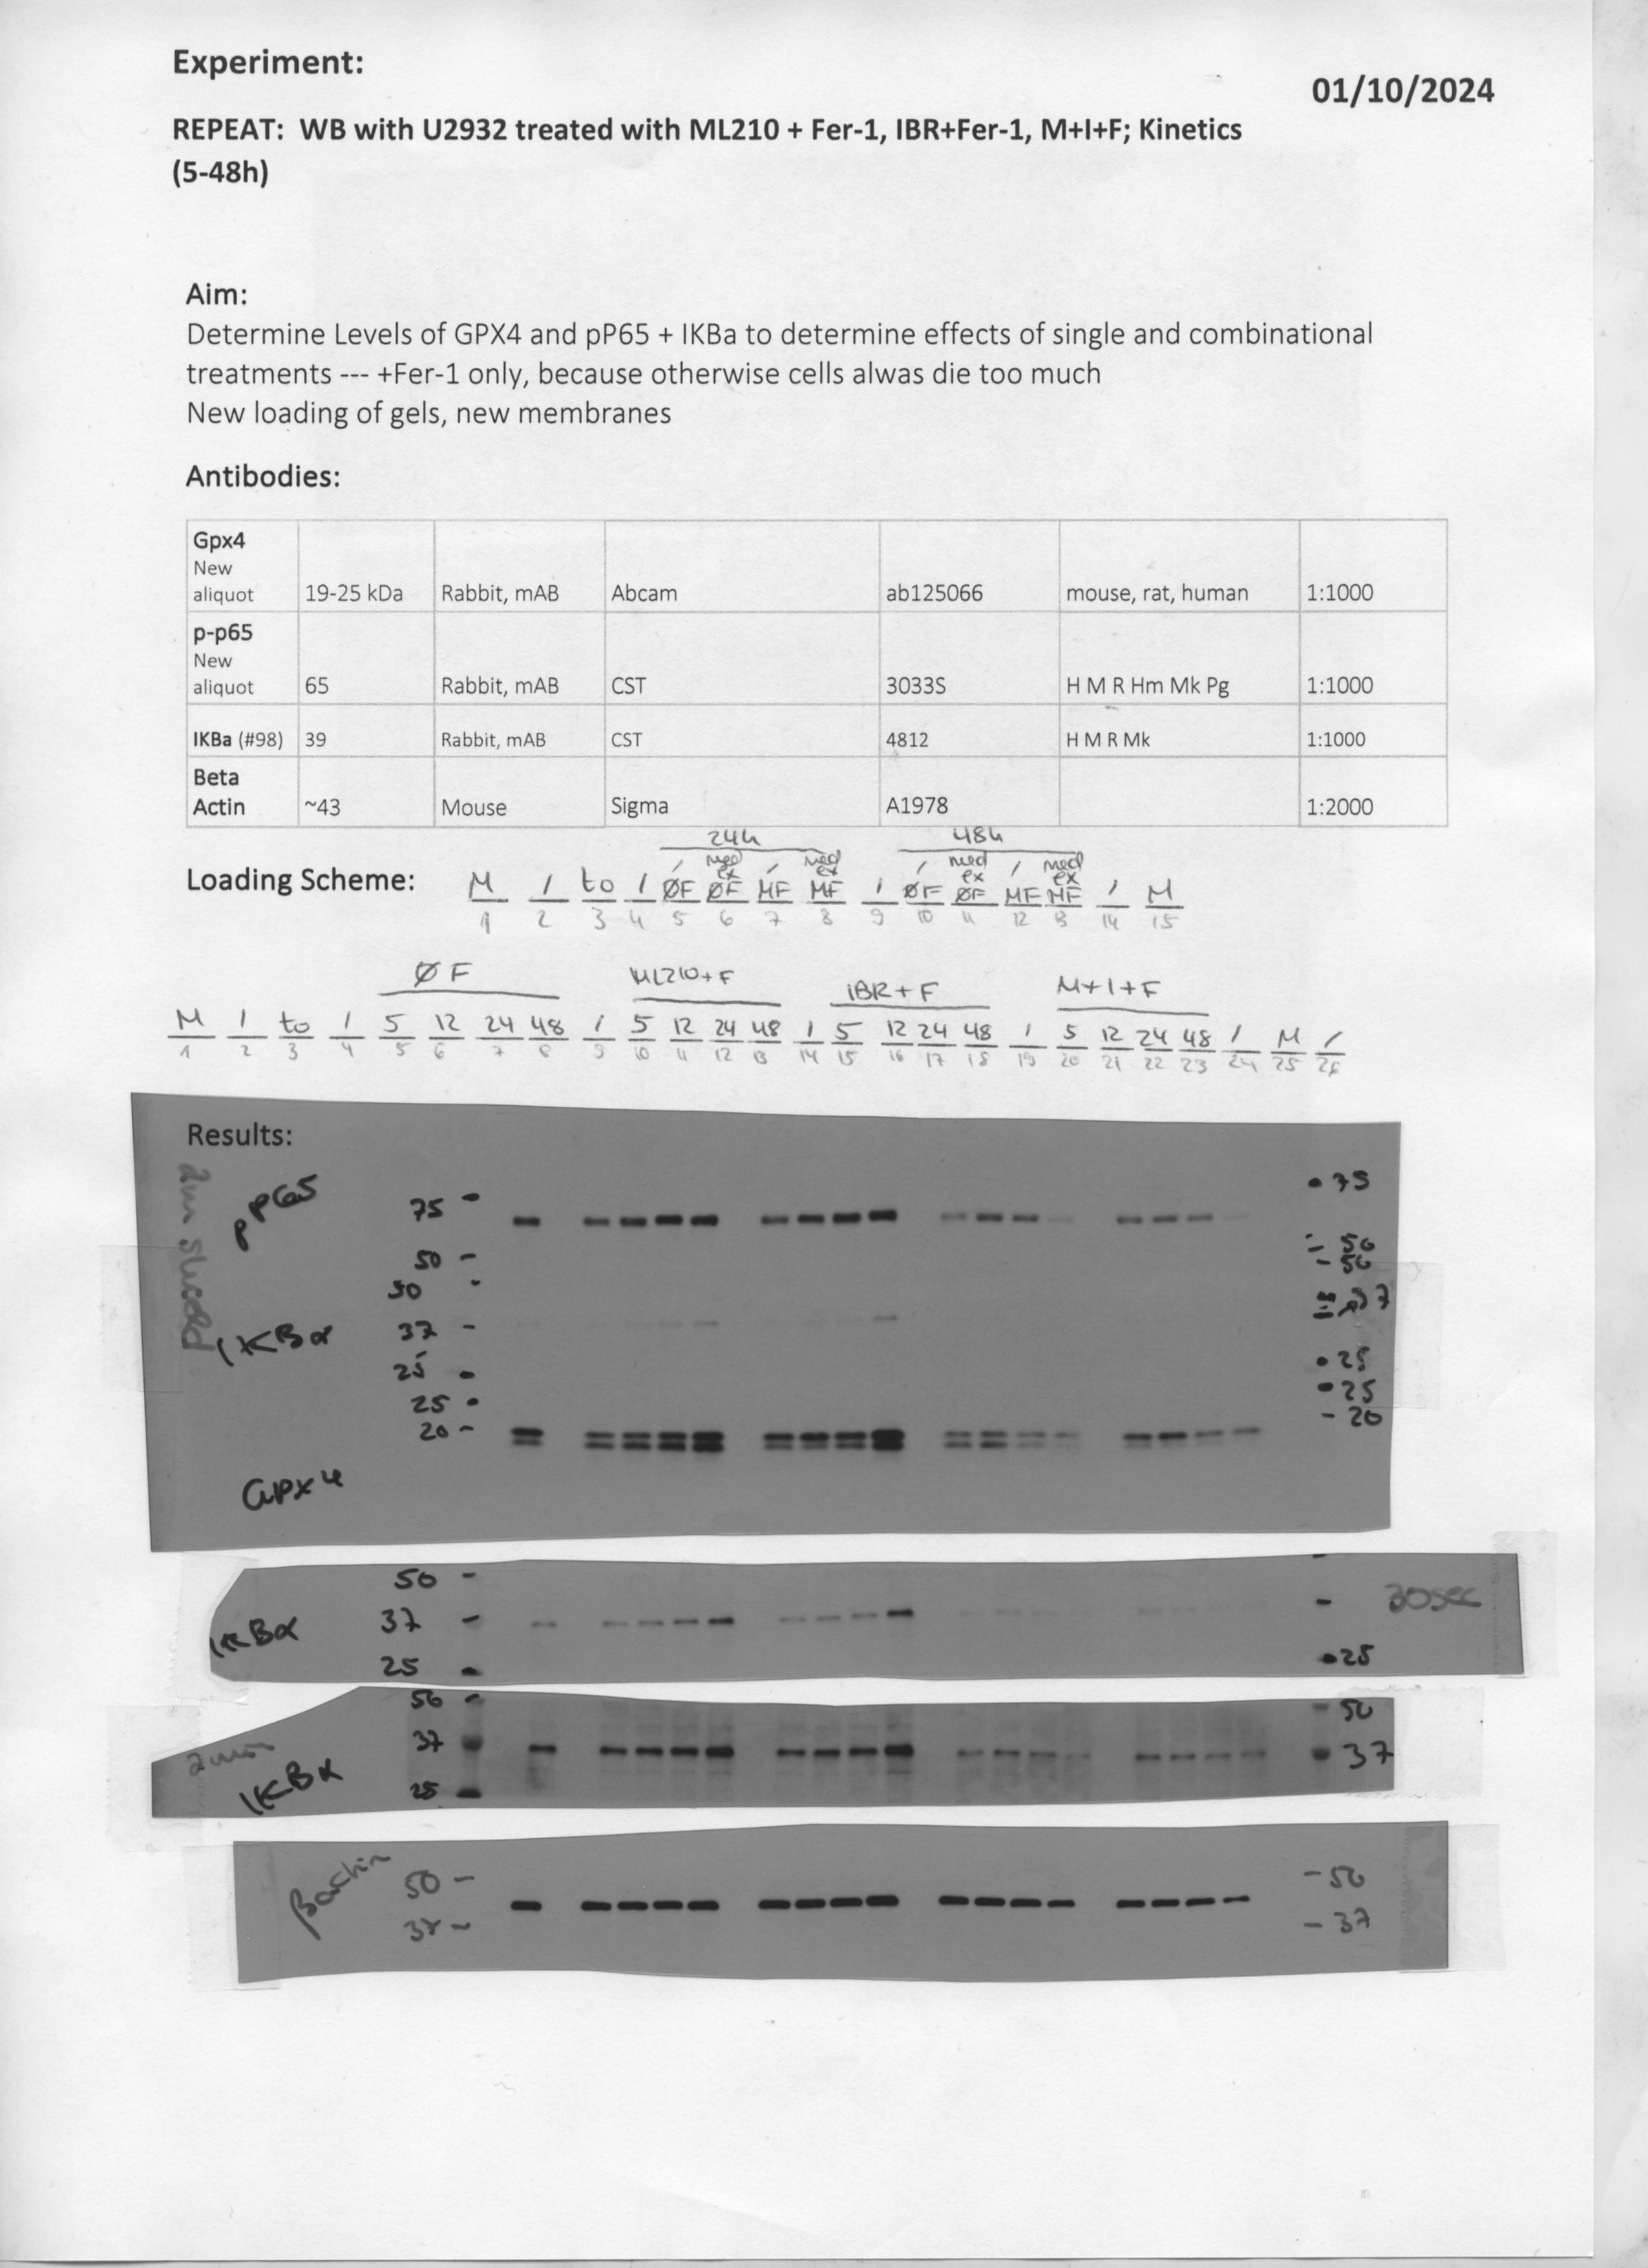


Figure 4E


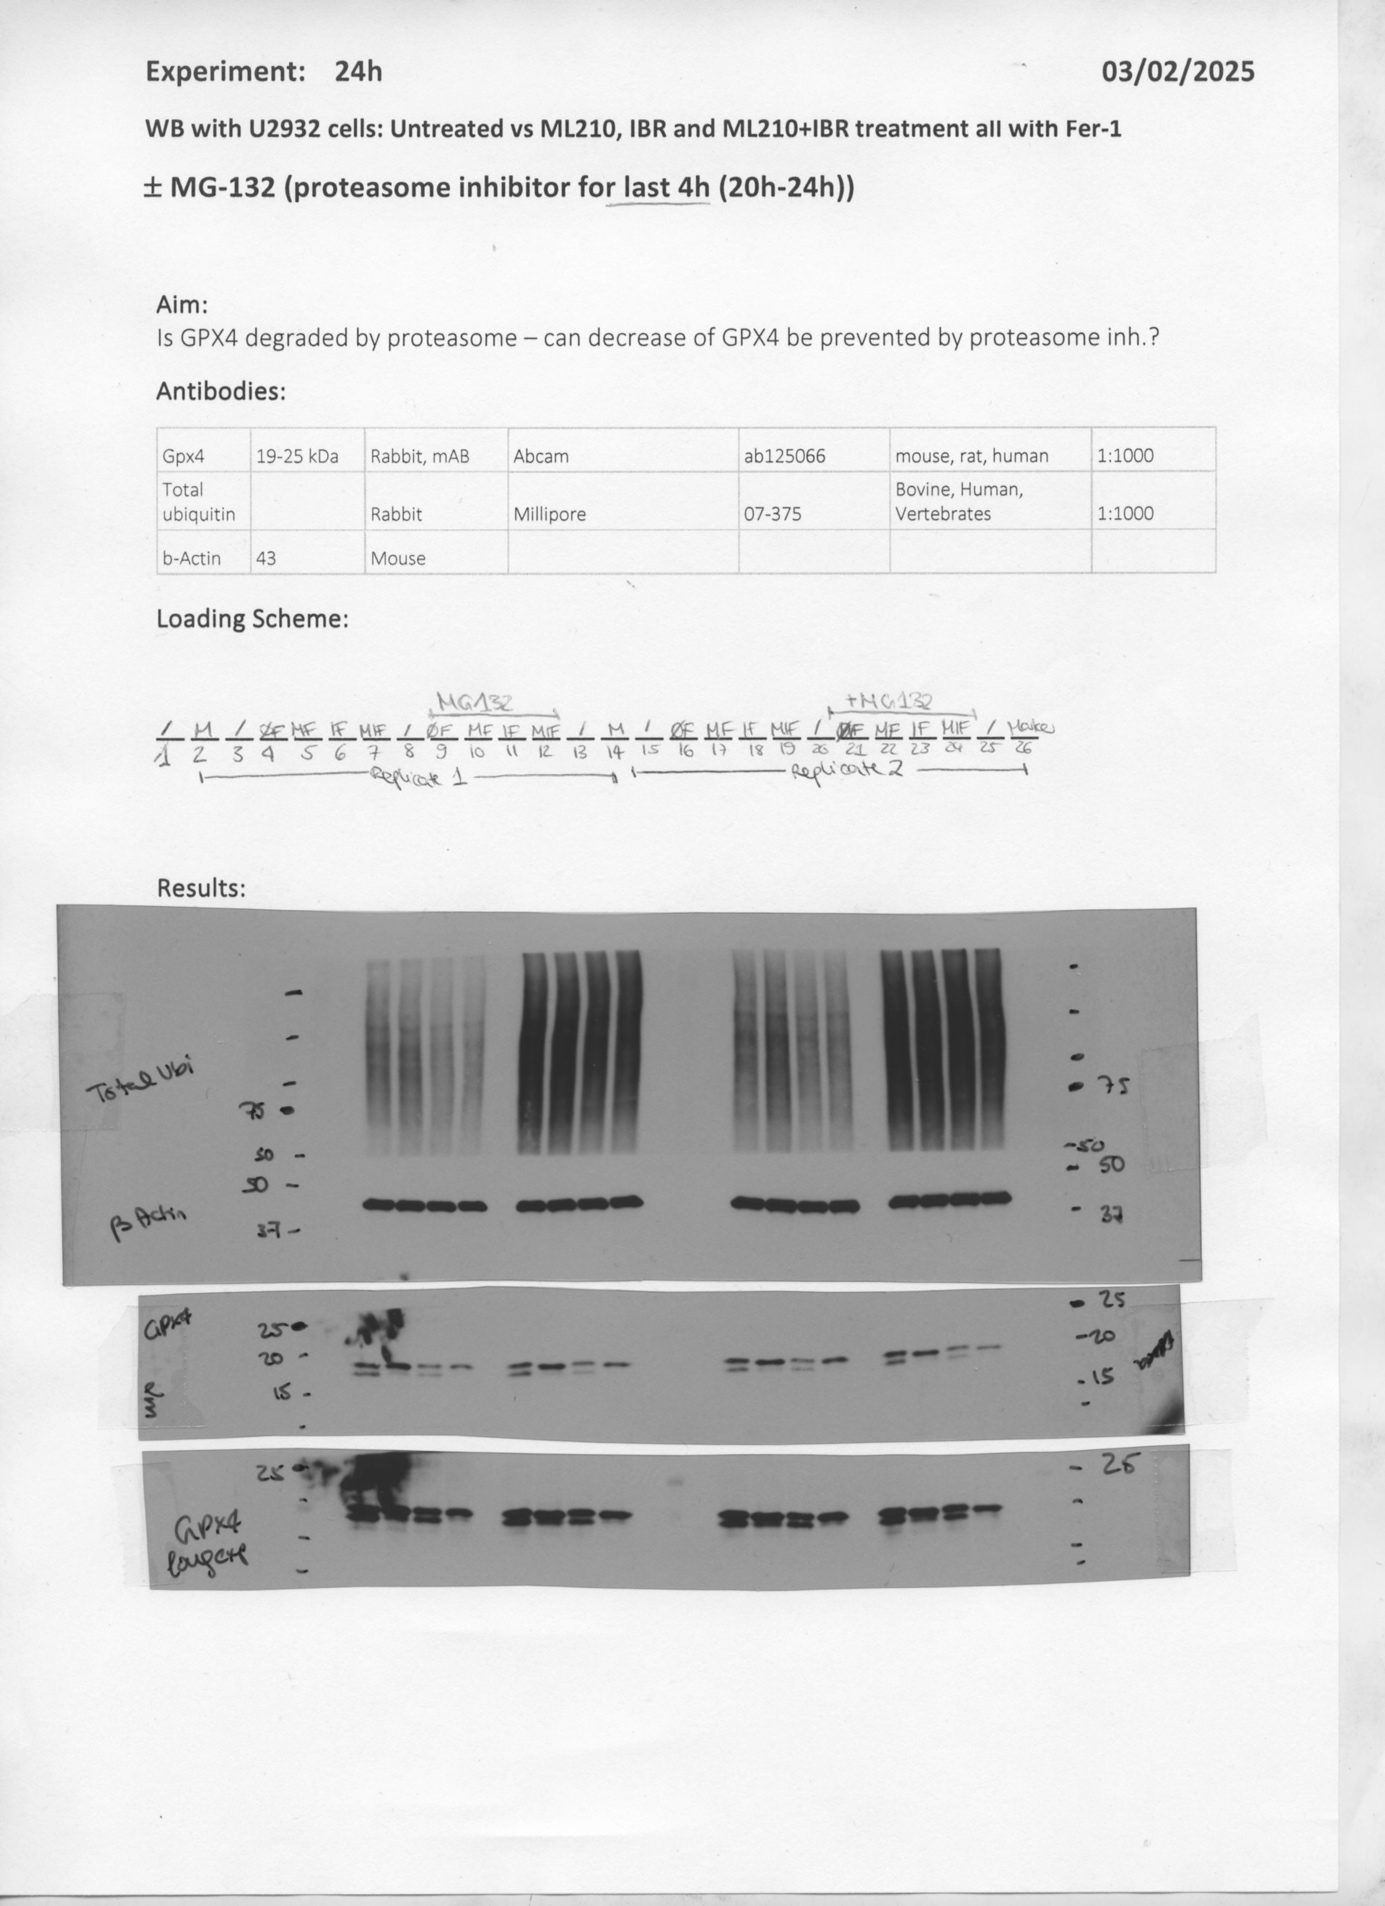


Figure 4F


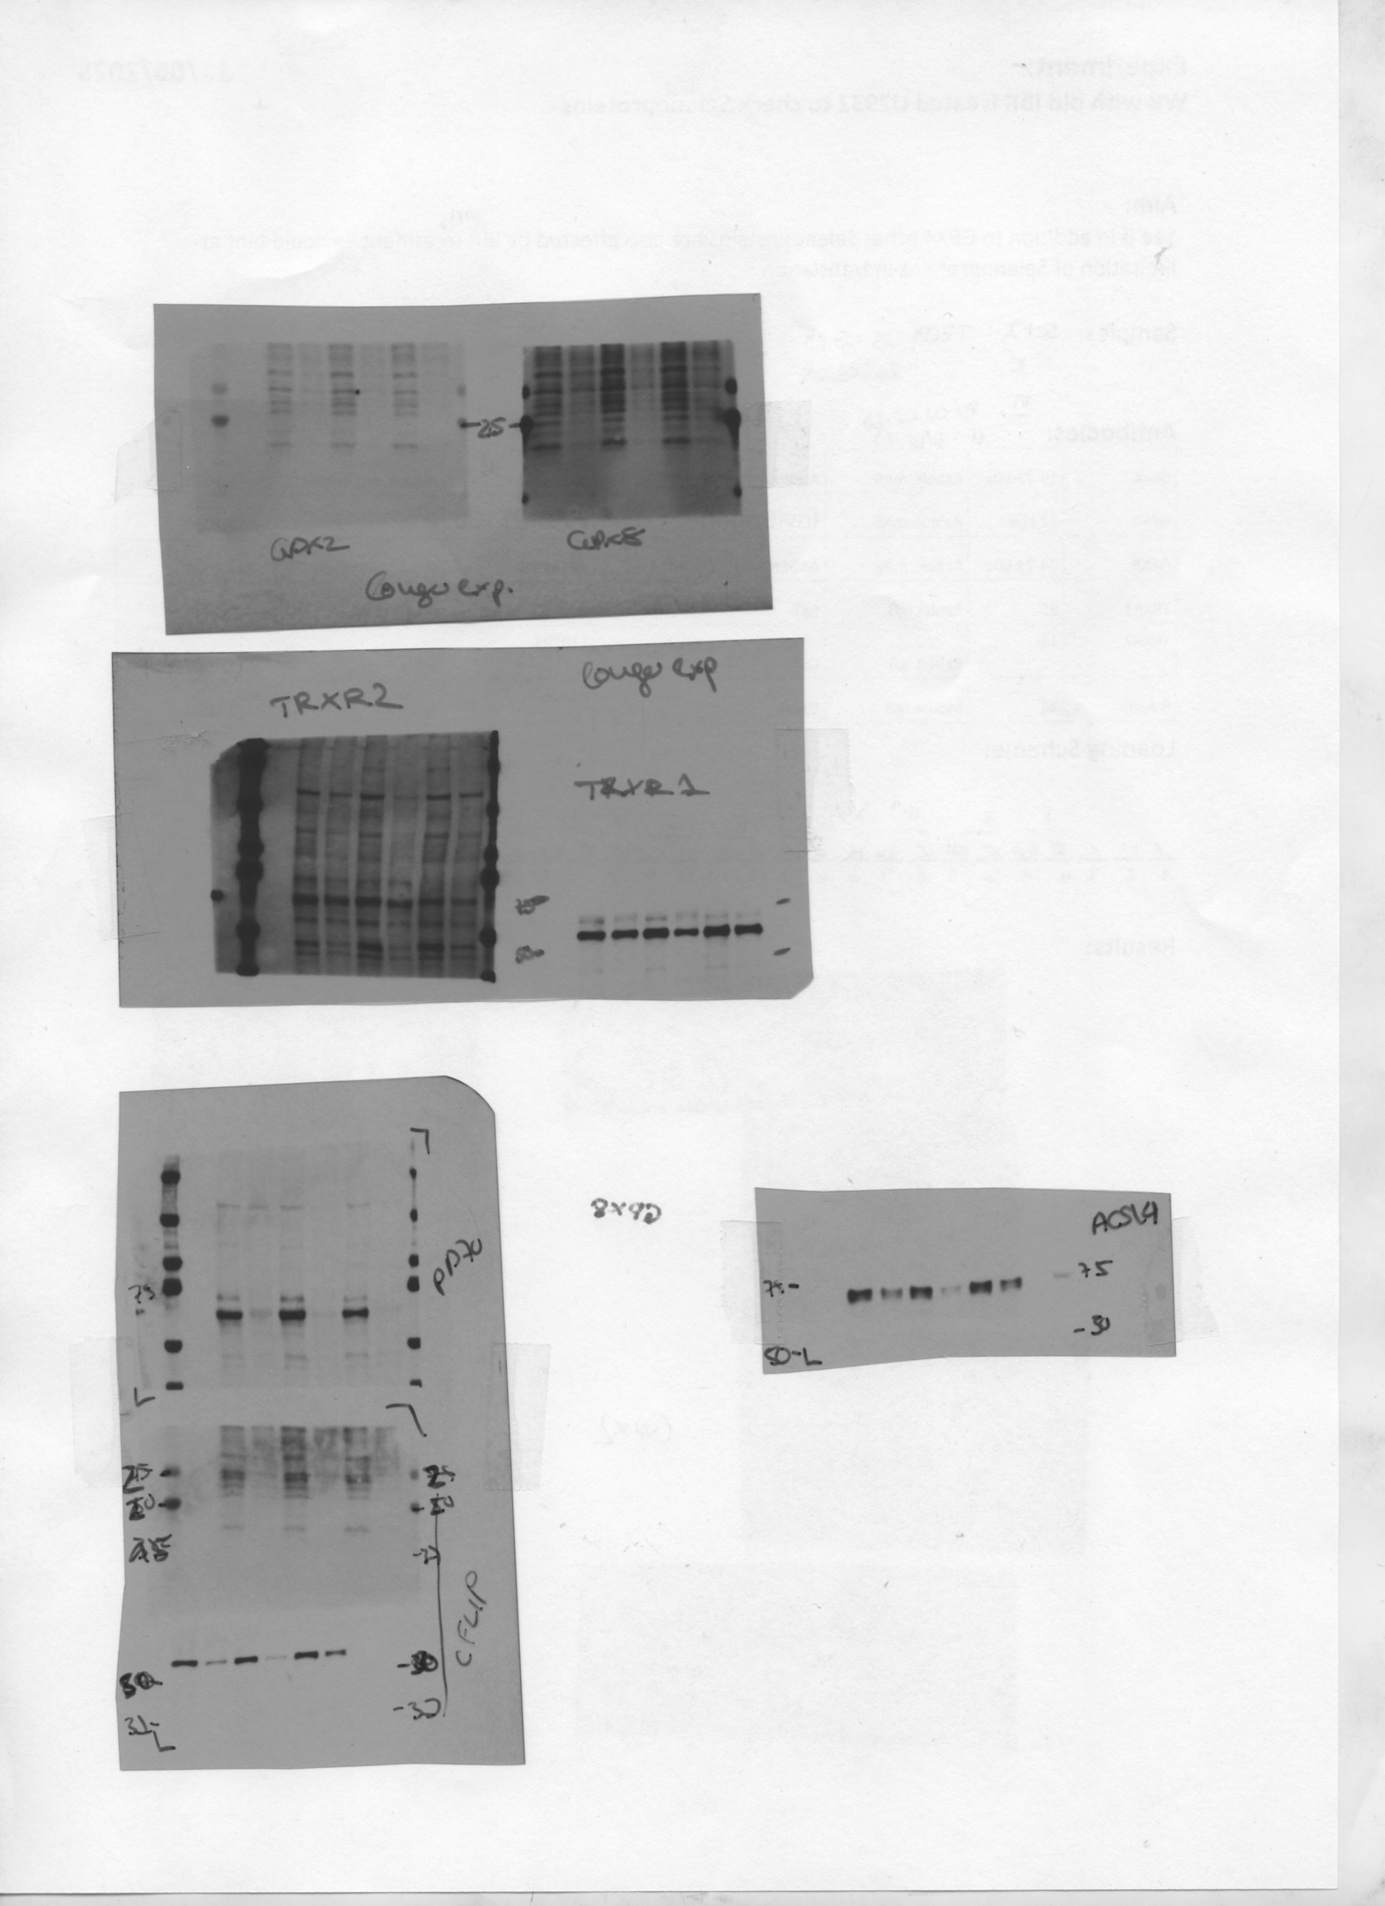

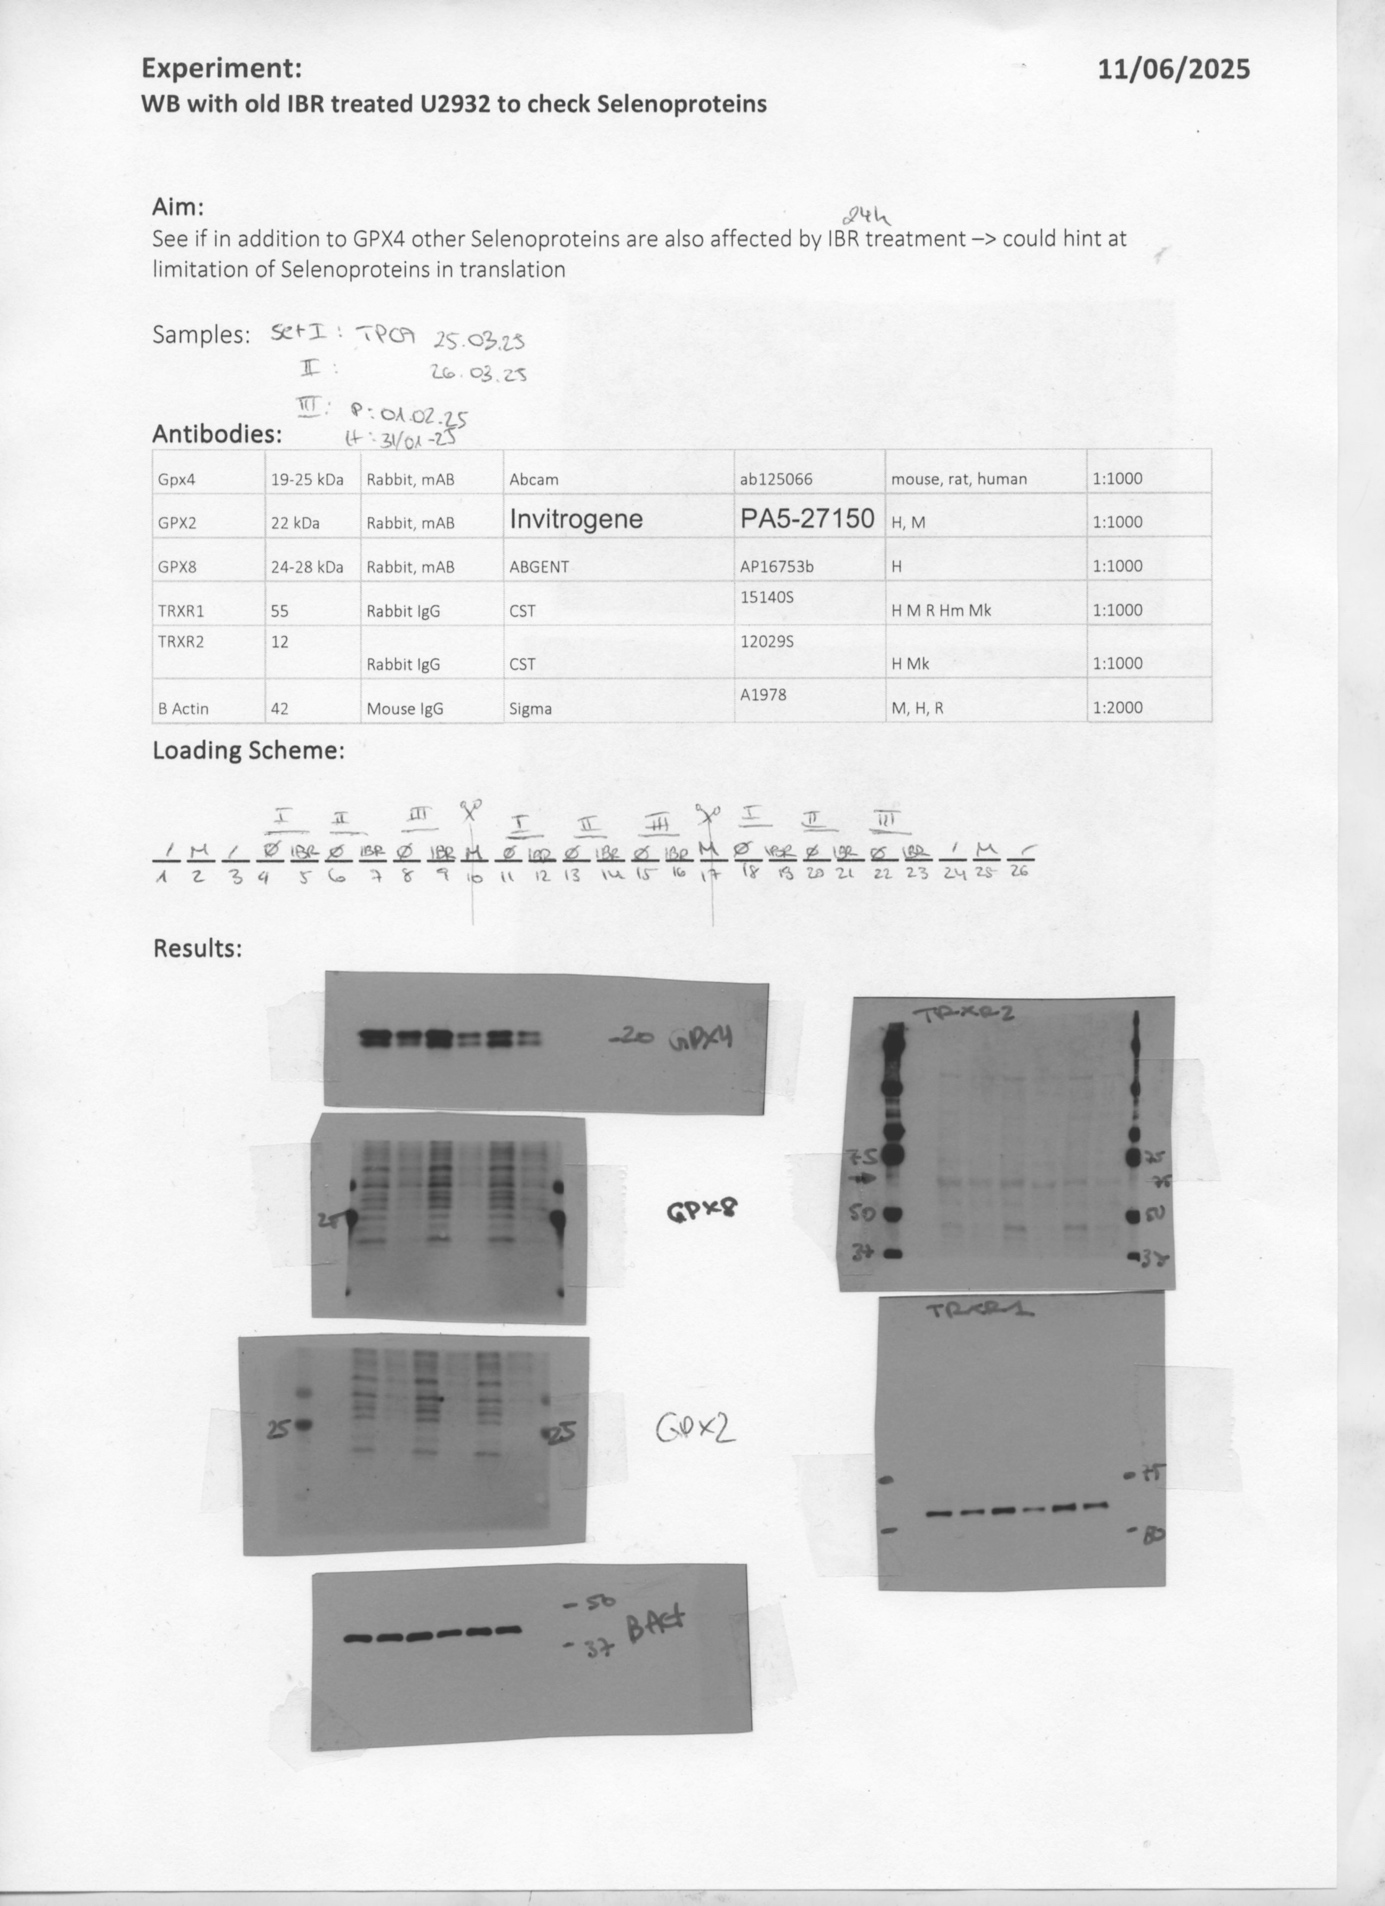


Figure 4H


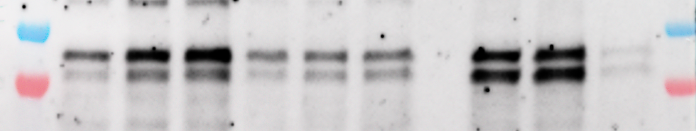
ACSL4


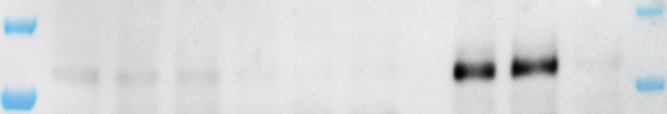
CD71


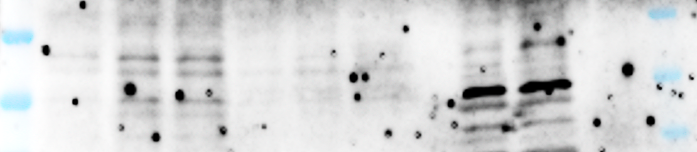
xCT


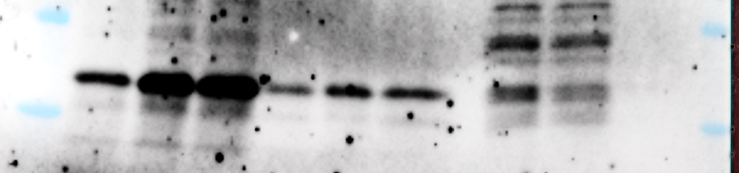
GPX4


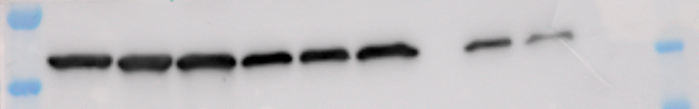
beta actin


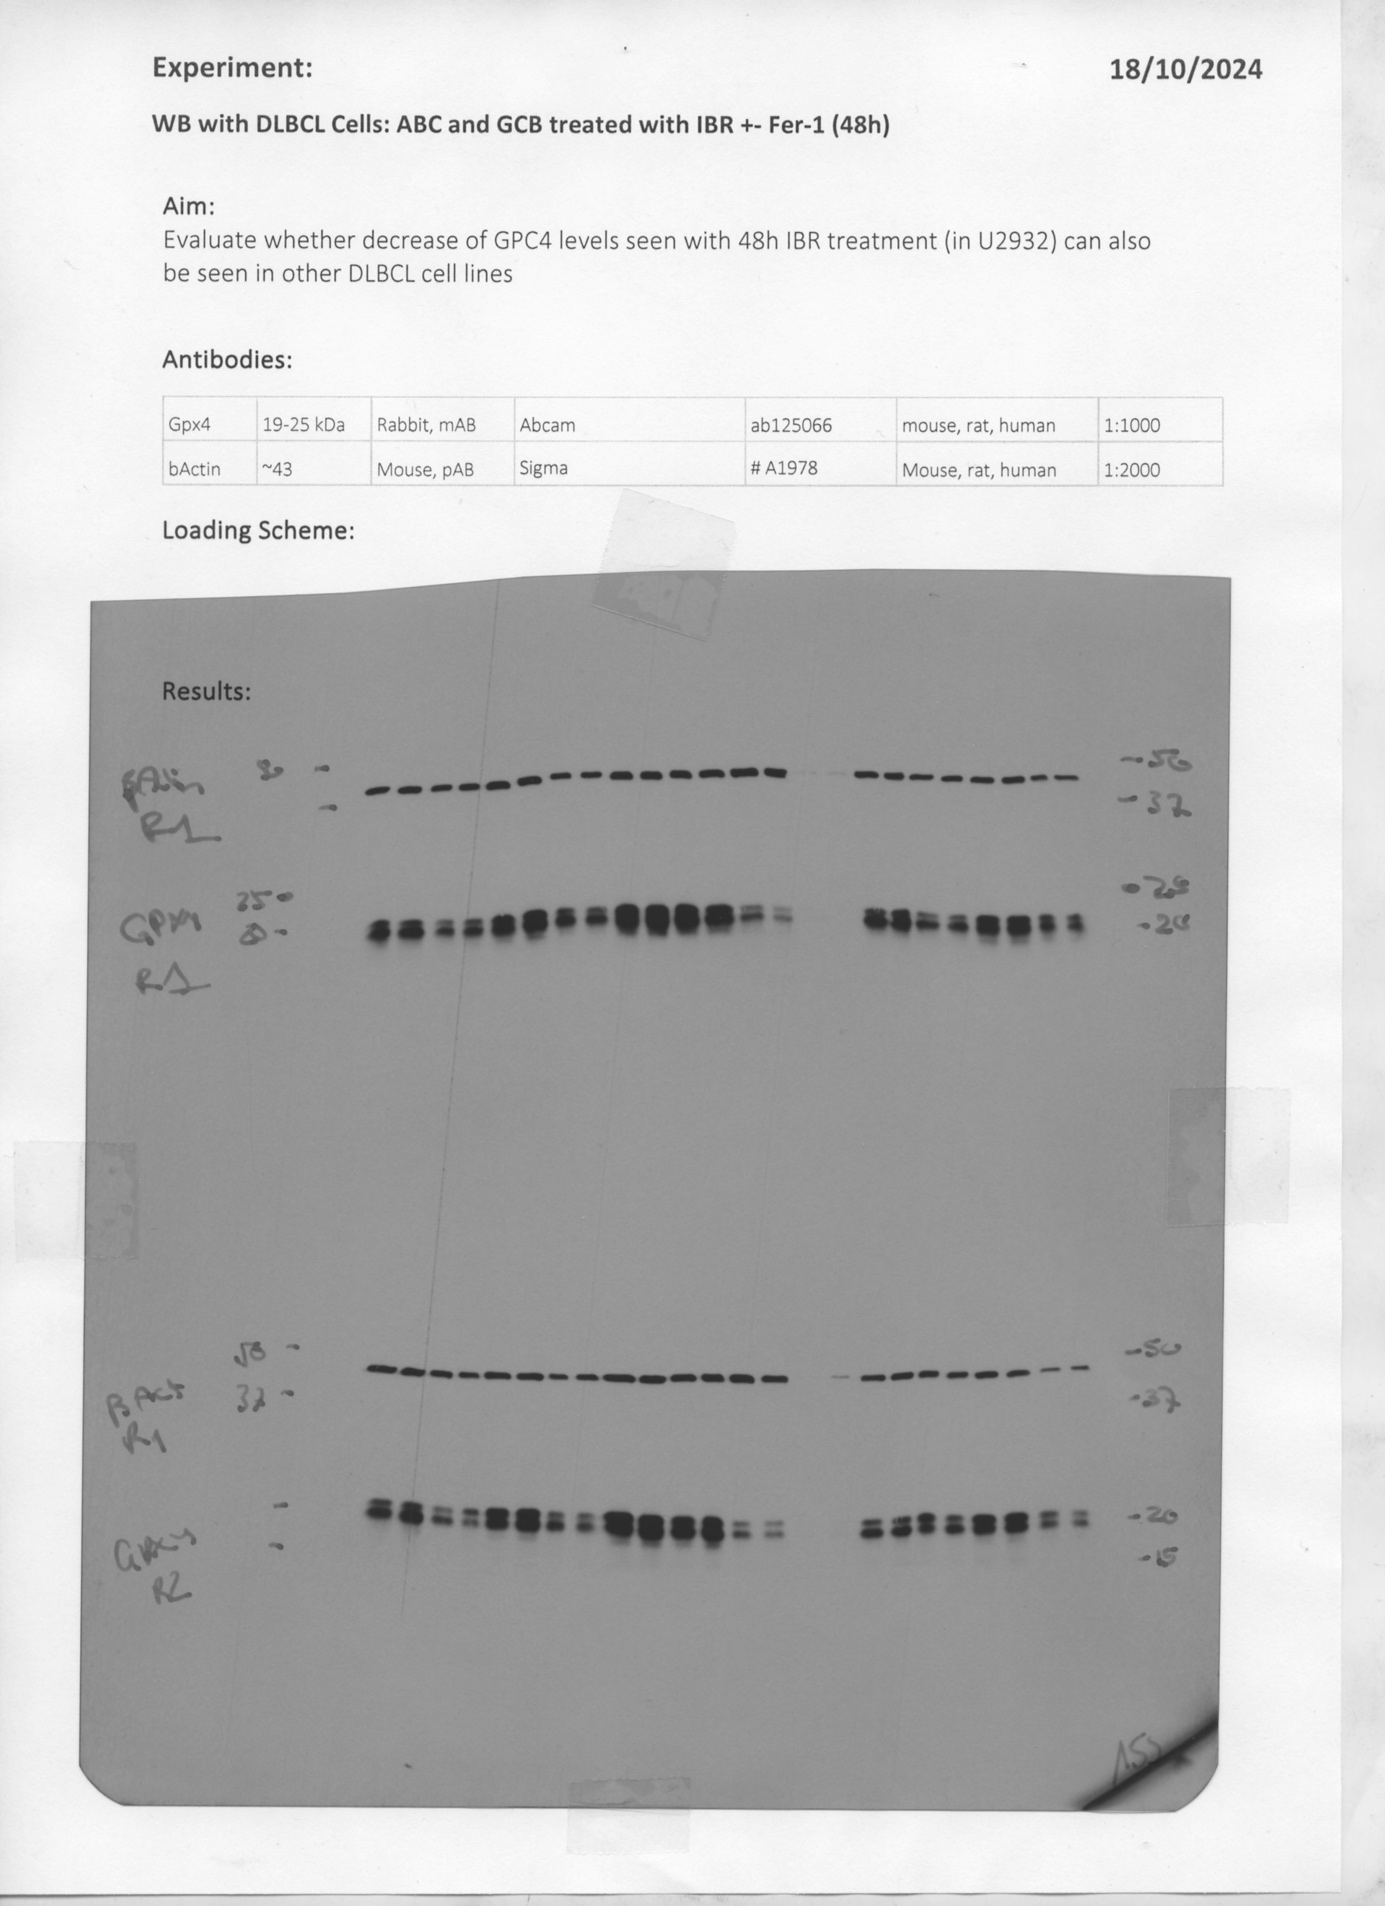


Suppl. Fig. 4A


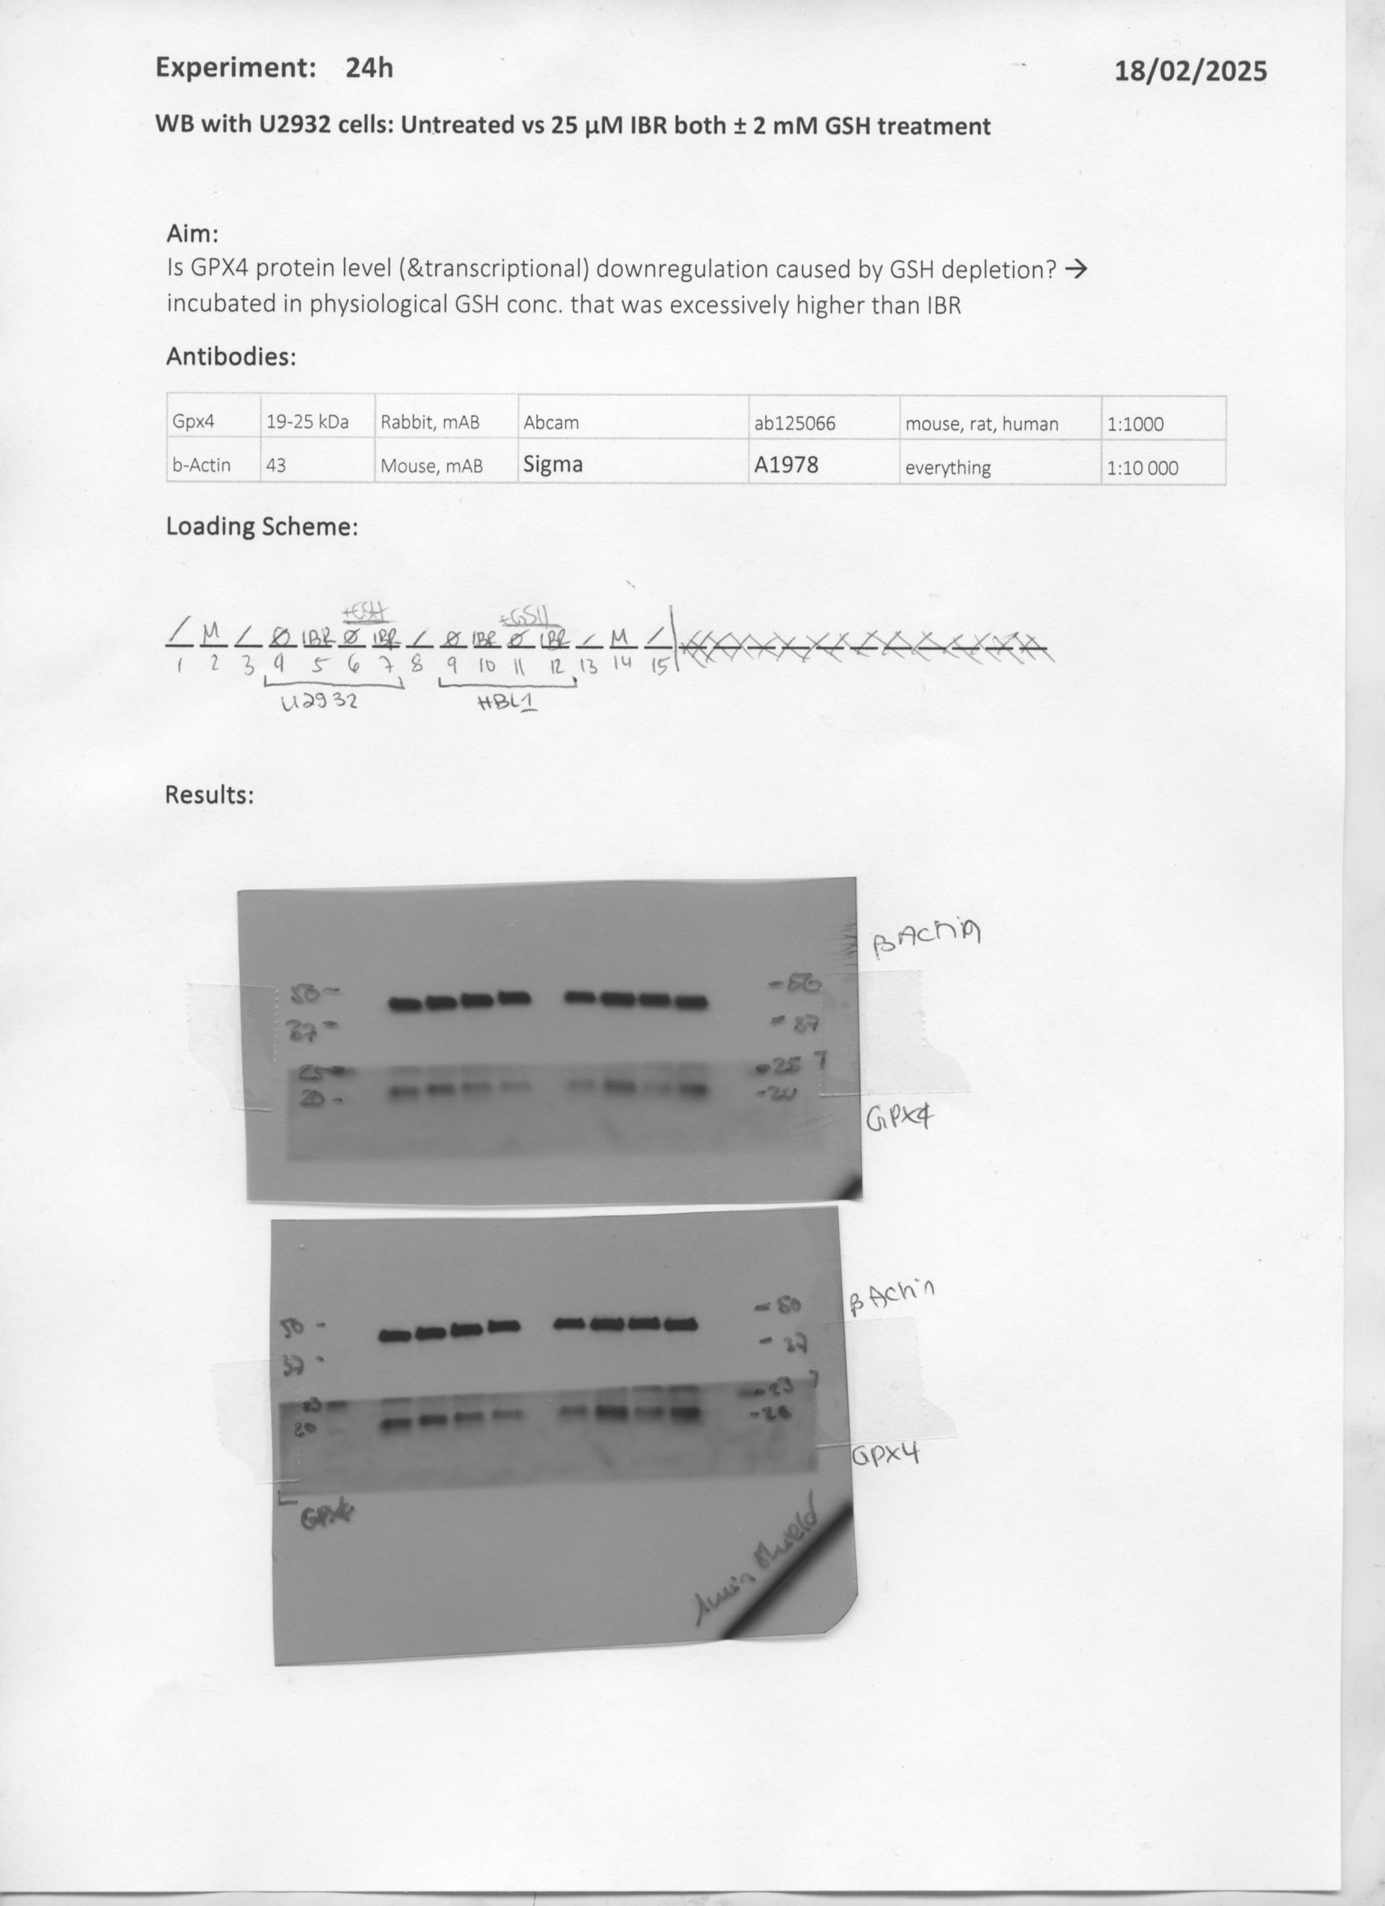

Supplement: Supplementary file 1 [file 6fba92d27ef5bc8e7245f961.docx]
